# Supplementary material
Source: ML conference proceedings conference paper supplement (https://aclanthology.org/2023.ijcnlp-main.58)
Supplement: Dataset [file 2023.ijcnlp-main.58.Dataset.pdf]

Our dataset is available at <https://github.com/sopankhosla/GrailQA-PlusPlus>
